# Supplementary material for: Lack of Charge Interaction in the Ion Binding Site Determines Anion Selectivity in the Sodium Bicarbonate Cotransporter NBCe1
Source: MDPI journal article supplement (doi:10.3390/ijms23010532), 2022-01-04
Supplement: s1 [file s1]

**Table S1.** Primer sequence used to construct mutant transporters

| Primer      | Sequence (5' to 3')                                                                                            |
|-------------|----------------------------------------------------------------------------------------------------------------|
| D555E       | Forward: ATCTTTATCTATGAAGCTTTCAAGAAG<br>Reverse: CTTCTTGAAAGCTTCATAGATAAAGAT                                   |
| TM5/NBCe1   | Forward: GATCAAGCTTGCATGCTACTACCCCATC<br>Reverse: GATGGGGTAGTAGCATGCAAGCTTGATC                                 |
| TM5/NBCn1   | Forward: GCTCTTTGATTTAGCATGCACATATGC<br>Reverse: GCATATGTGCATGCTAAATCAAAGAGC                                   |
| E558K (E-K) | Forward: CTACGAGGCTTTGAAGAAGCTCTTTGATTTAGCAGATTACTACC<br>Reverse: GGTAGTAATCTGCTAAATCAAAGAGCTTCTTCAAAGCCTCGTAG |
| D562K       | Forward: CTACGAGGCTTTGGAGAAGCTCTTTAAGTTAGCAGATTACTACC<br>Reverse: GGTAGTAATCTGCTAACTTAAAGAGCTTCTCAAAGCCTCGTAG  |
| E558K/D562K | Forward: CTACGAGGCTTTGAAGAAGCTCTTTAAGTTAGCAGATTACTACC<br>Reverse: GGTAGTAATCTGCTAACTTAAAGAGCTTCTTCAAAGCCTCGTAG |
| N-K         | Forward: ATCTTTATCTATAATGCTTTCAAGAAG<br>Reverse: CTTCTTGAAAGCATTATAGATAAAGAT                                   |
| Q-K         | Forward: CATCATATTCATCTACCAGGCTTTGAAGAAGCTC<br>Reverse: GAGCTTCTTCAAAGCCTGGTAGATGAATATGATG                     |
| E-R         | Forward: CTACGAGGCTTTGAGGAAGCTCTTTGATTTAG<br>Reverse: CTAAATCAAAGAGCTTCTCAAAGCCTCGTAG                          |
